# Supplementary material for: Molecular determinants and modifiers of Matrin-3 toxicity, condensate dynamics, and droplet morphology
Source: PubMed Central journal article supplement — iScience. 2022 Feb 11;25(3):103900. doi: 10.1016/j.isci.2022.103900 (PMC8889142; doi:10.1016/j.isci.2022.103900), 2022-02-11
Supplement: mmc1.pdf [file mmc1.pdf]

iScience, Volume 25

## **Supplemental information**

### **Molecular determinants and modifiers of Matrin-3 toxicity, condensate dynamics, and droplet morphology**

**Macy L. Sprunger, Ken Lee, Brian S. Sohn, and Meredith E. Jackrel**

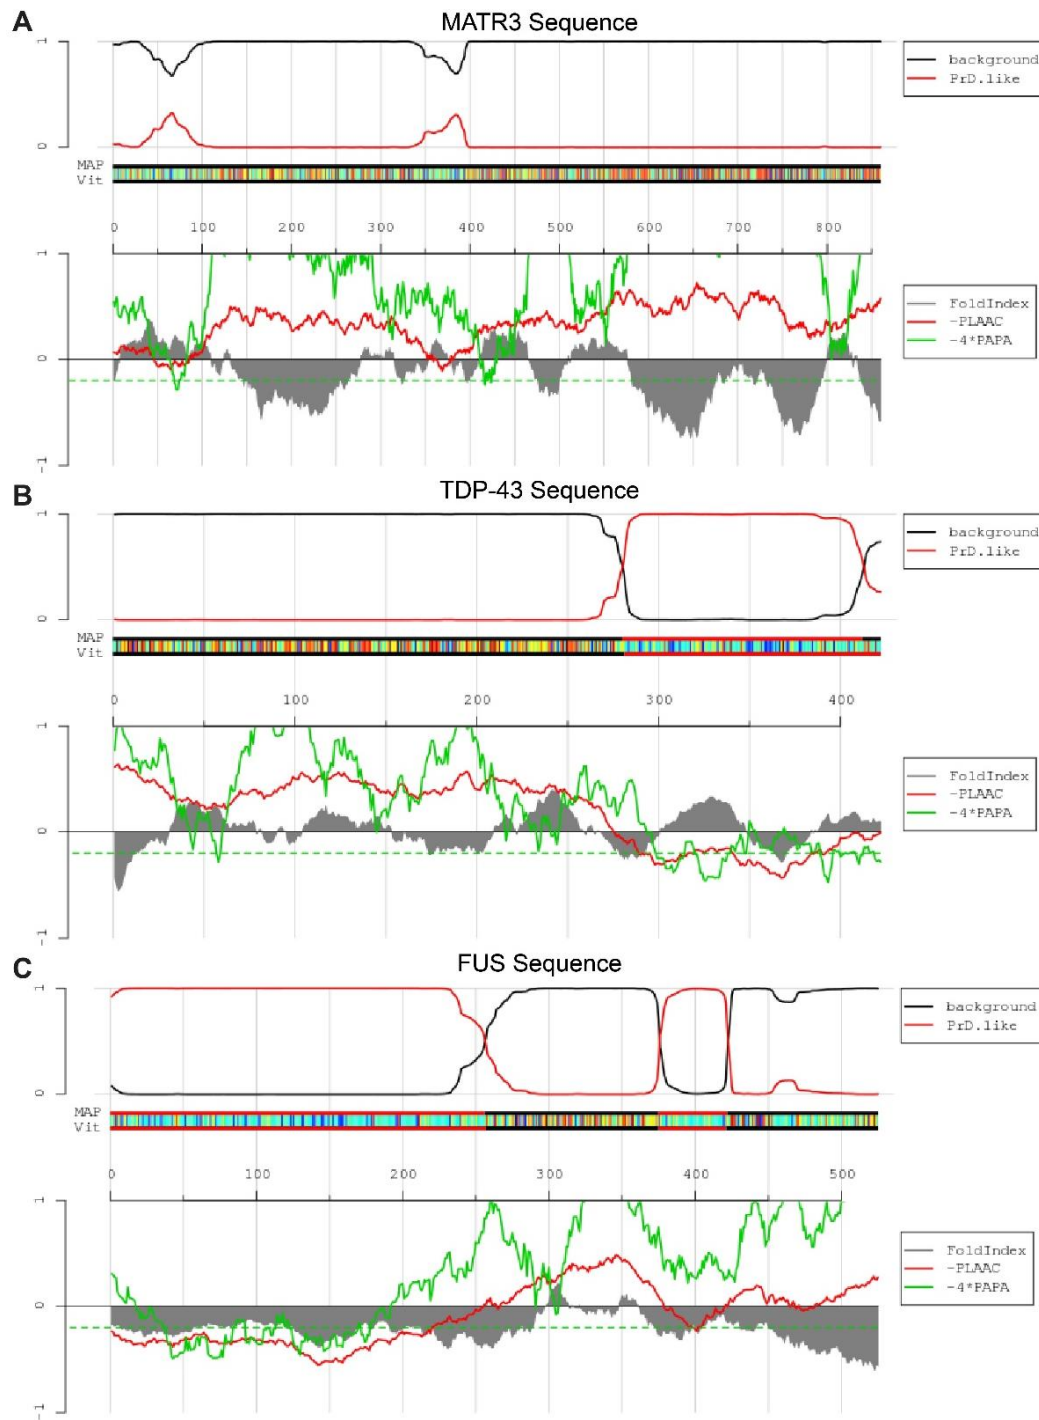

**Supplemental Figure 1: PLAAC Scores of MATR3, TDP-43, and FUS, related to Figure 1.** Computational analysis of (A) MATR3, (B) TDP-43, and (C) FUS protein sequences by the PLAAC algorithm. A PLAAC score of one indicates a region with prion-like amino acid composition. The C-terminal region of TDP-43 and the N-terminal region of FUS both have PLAAC scores of one, indicating prion-like domains. The PLAAC score of MATR3 never reaches a value of one, indicating that MATR3 does not have a region with amino acid composition similar to that of yeast prions.

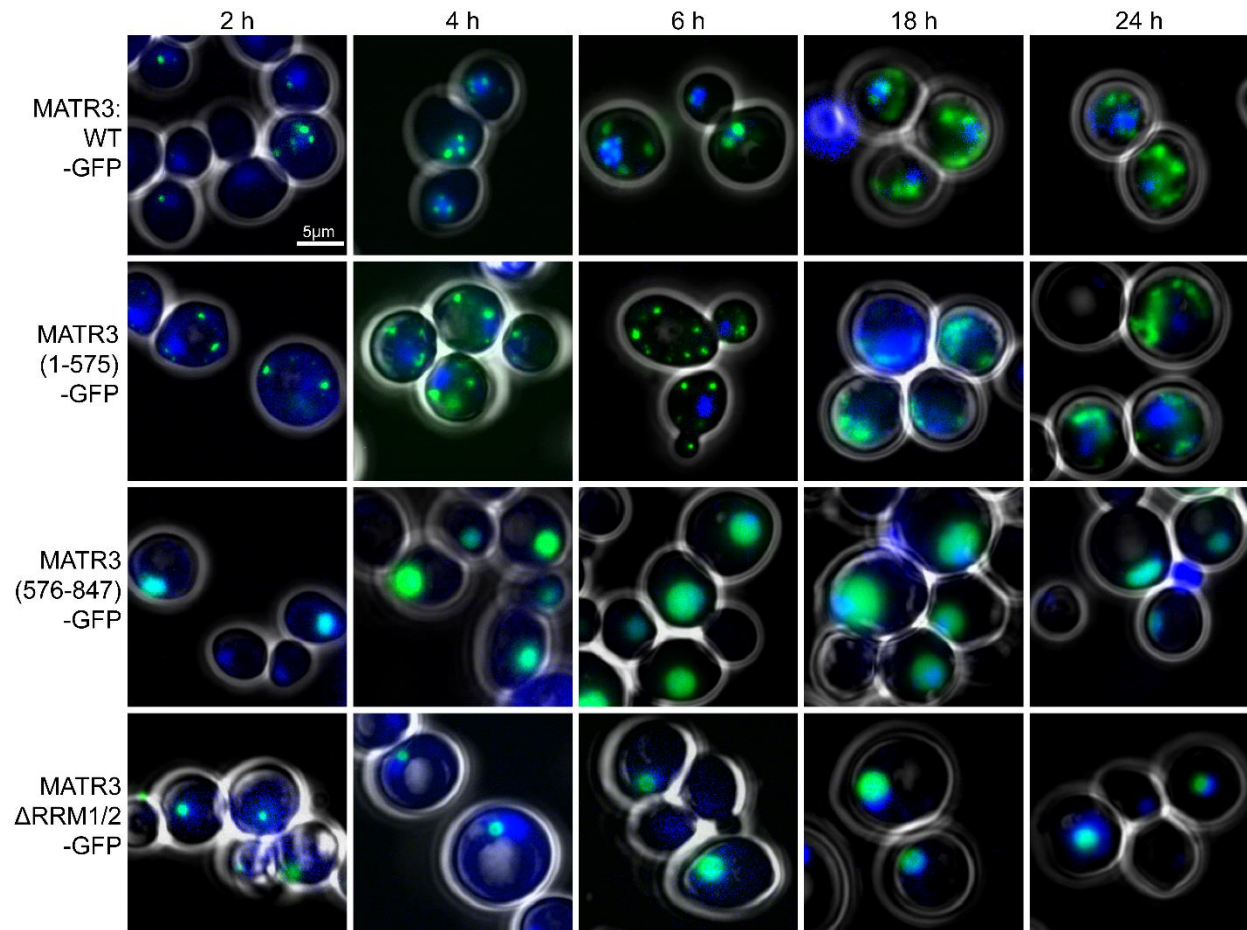

**Supplemental Figure 2: Foci formation of MATR3 variants at various induction times, related to Figure 5.** The indicated strains from Figure 5 were induced and imaged at the indicated timepoints. Merge channel includes GFP (green), Hoechst (blue), and bright field (gray) images. Representative images are shown. Scale bar, 5 $\mu$ m.
